# Supplementary material for: Informant Discrepancy in Report of Parent-adolescent Conflict as a Predictor of Hopelessness among Depressed Adolescents: A Replication Study
Source: Springer Nature journal article supplement (doi:10.1007/s10826-023-02610-3), 2023-06-14
Supplement: MOESM2 [file 25488294]

## **Supplementary materials 2 - Appendix**

In this appendix, we describe procedures to establish measurement invariance and measurement model fit, as well as report item parameter estimates and plots showing the reliability and the fit of the measurement model.

### **Establishing measurement invariance using leave-one-out crossvalidation**

Latent difference score modelling requires measurement invariance across informants (de Haan et al., 2018). Following the procedure outlined by Verhagen and Fox (2013), we fitted IRT models to the CBQ data with item parameters allowed to differ between parent and adolescent informants and models with item parameters constrained to be equal. We then compared the fit of these models for each item using approximate leave-one-out cross-validation (Vehtari et al., 2019). Seven items (CBQ item numbers 9, 18, 21, 39, 42, 48, and 66) were found to have substantially better fit with item parameters allowed to differ between parents and adolescents, and these items were removed in the analysis.

### **Evaluating IRT model fit by plotting**

To evaluate the fit of the IRT model we plotted the observed probabilities of endorsing an item at different levels of the latent conflict variable together with item characteristic curves from the fitted model. We used the posterior means of the latent conflict variable and divided those into groups by 0.5 increments of the latent variable. For each item we then computed the proportion of endorsements in each group, giving the observed probability of endorsement at that approximate level of conflict. We plotted these probabilities along with 500 item characteristic curves sampled from the posterior distributions of the item parameters. This allowed us to assess the fit of the IRT model to the data, by comparing the observed probabilities of endorsement at different levels of latent trait with the posterior distribution of endorsement probabilities predicted by the model (Orlando & Thissen, 2000). These plots (see the following three pages) indicated acceptable or good fit of the IRT models for most items, except item 10 of the BHS. This item was also excluded from the analysis, bringing the final number of included items to 15 (CBQ) and 16 (BHS).

# Items from the CBQ Perception of the Dyad Subscale (15)

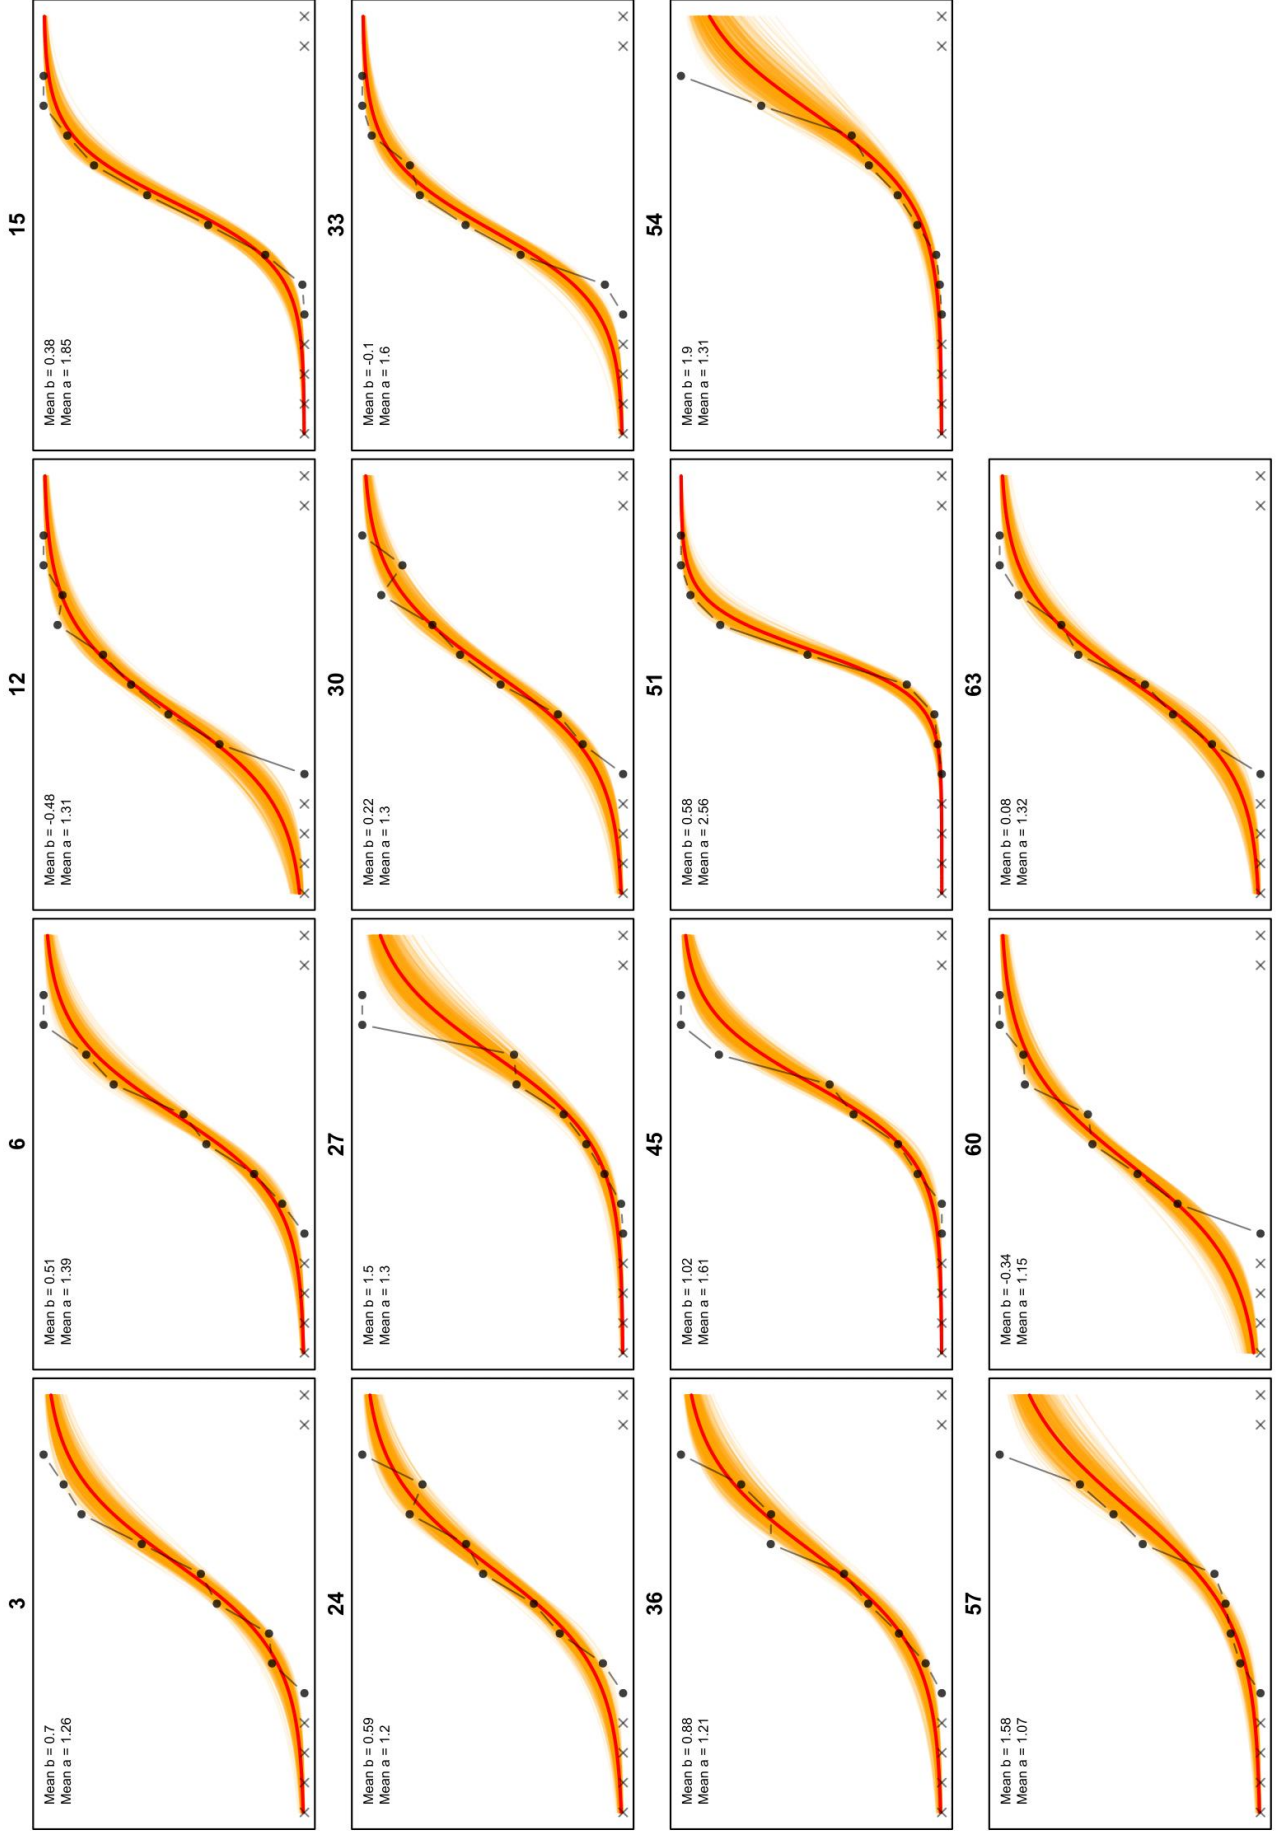

# Items from the Beck Hopelessness Inventory (17)

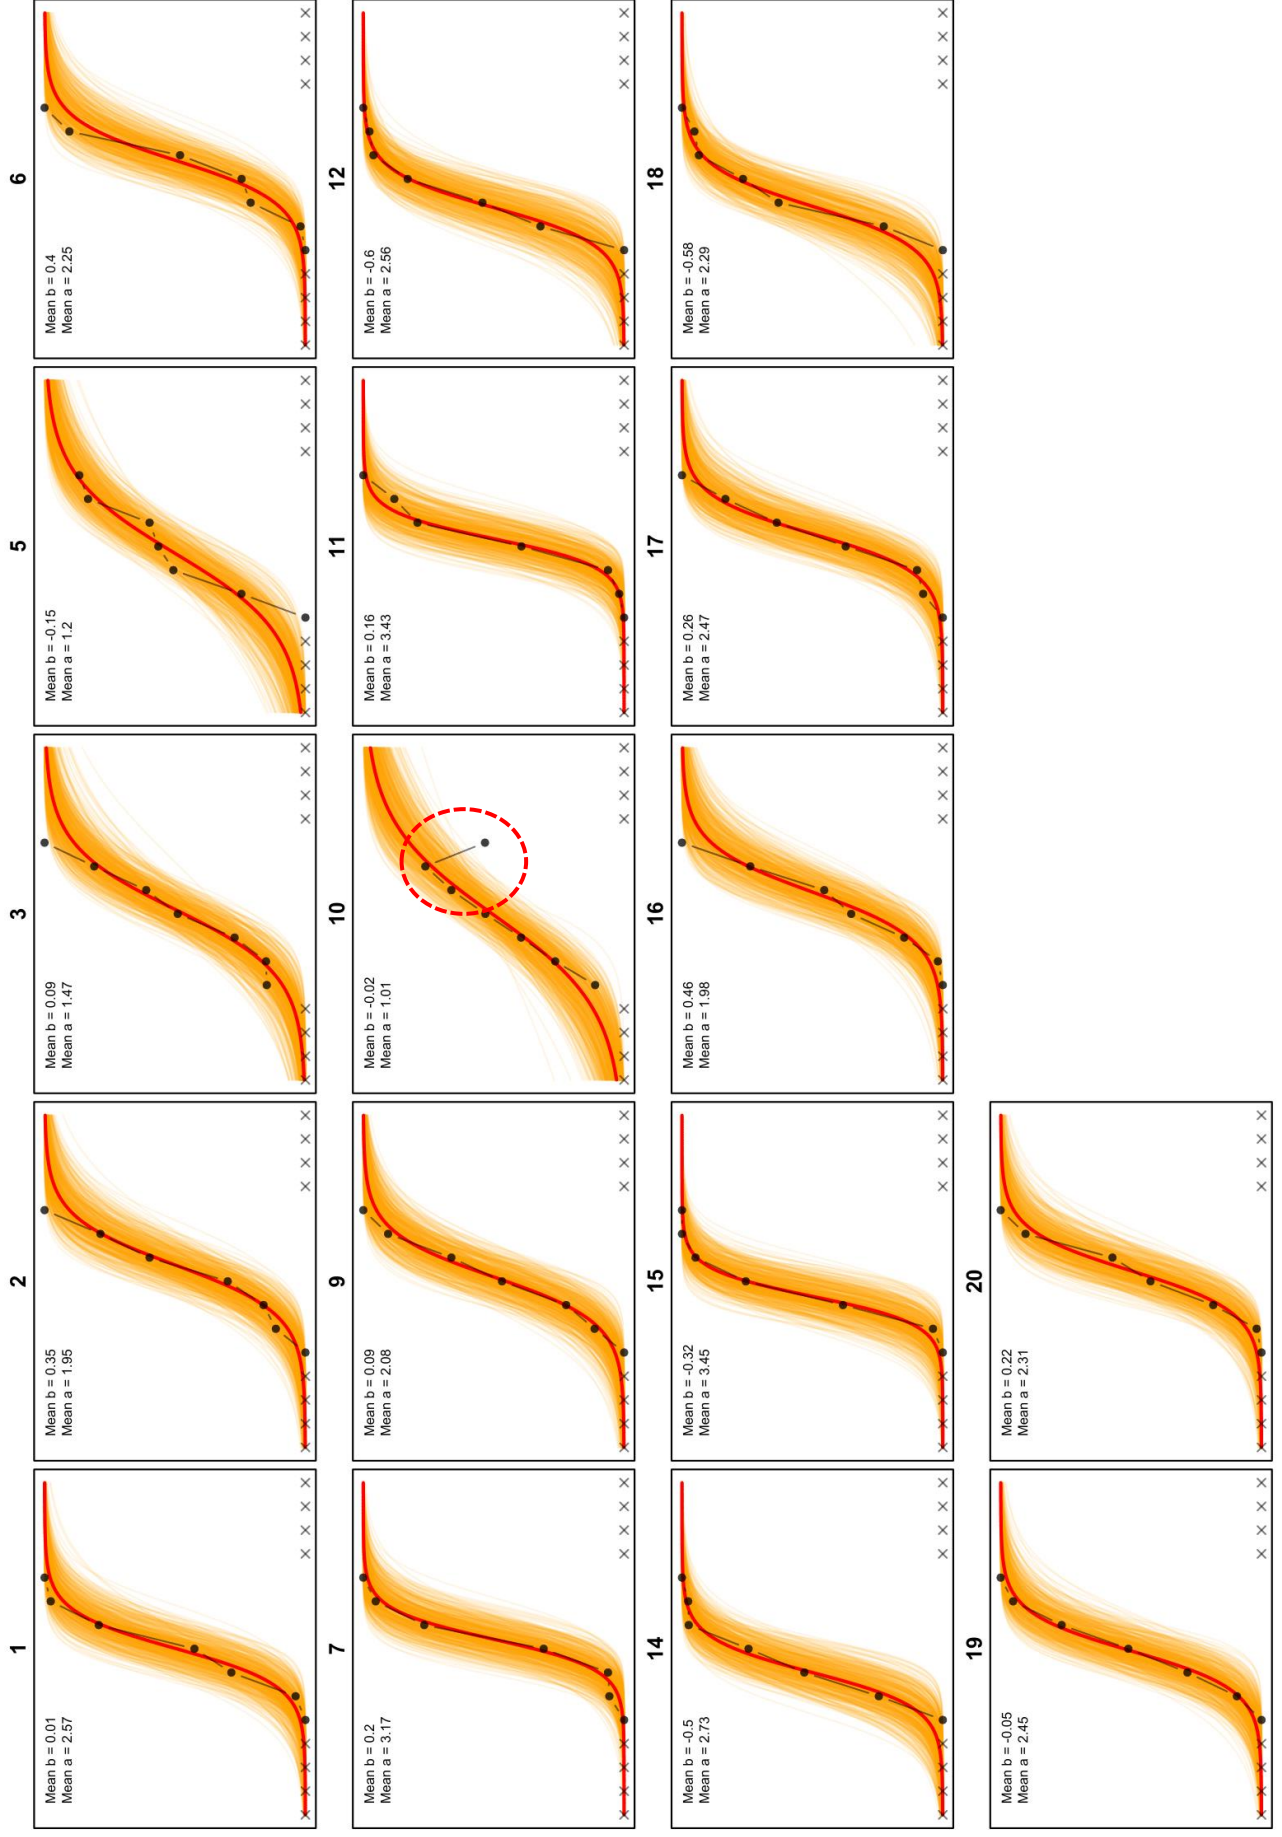

# Items from the Beck Hopelessness Inventory (16)

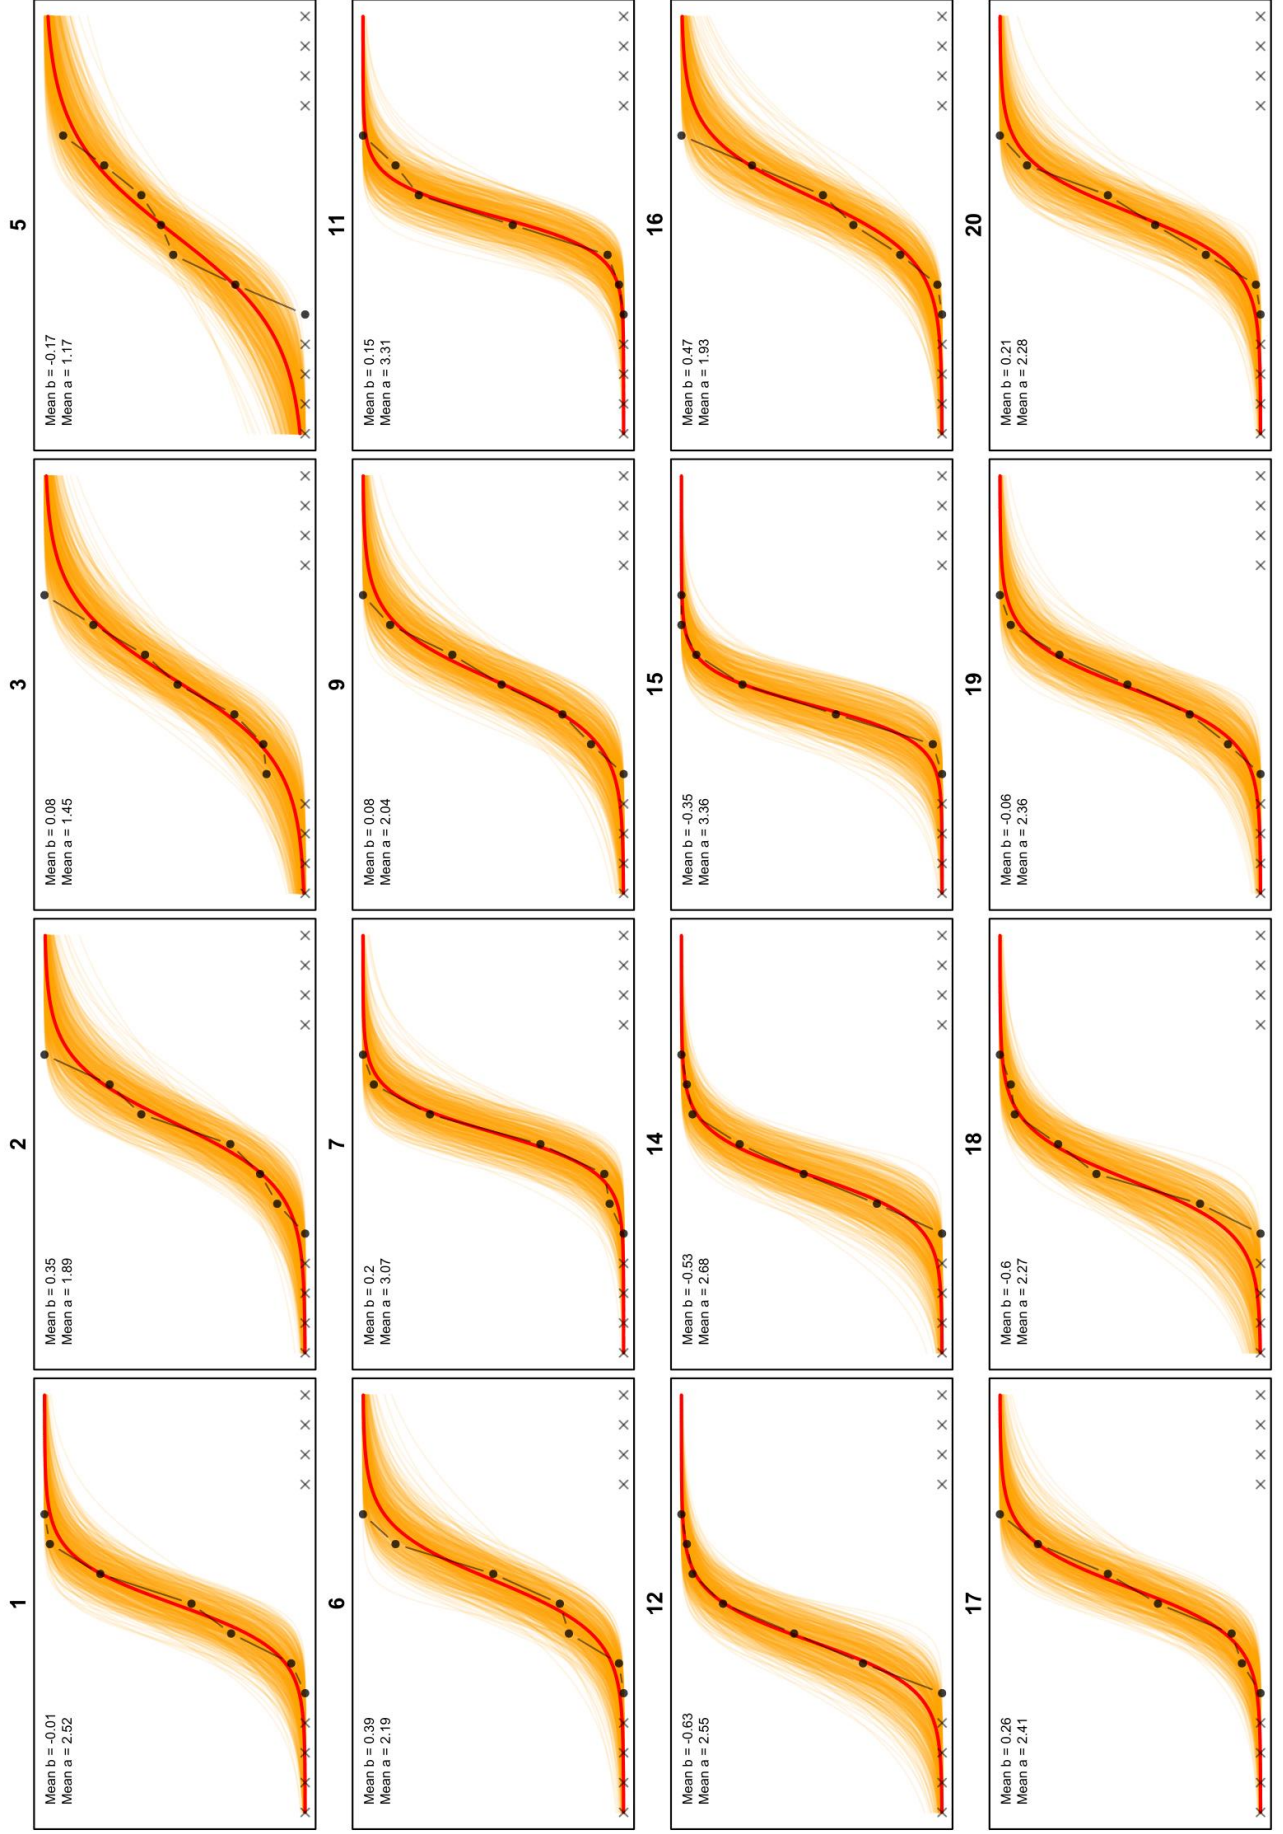

The posterior estimates for the IRT model item parameters are summarised in the following tables. The estimates are from the final measurement models, without the excluded items:

### Conflict Behavior Questionnaire

| Parameter                      | Mean  | SD   | 66% CI        | 90% CI        | ESS Bulk | ESS Tail |
|--------------------------------|-------|------|---------------|---------------|----------|----------|
| Item discrimination parameters |       |      |               |               |          |          |
| <i>Item 3</i>                  | 1.28  | 0.13 | 1.15 ; 1.40   | 1.07 ; 1.51   | 3541     | 3101     |
| <i>Item 6</i>                  | 1.40  | 0.15 | 1.26 ; 1.54   | 1.17 ; 1.64   | 2859     | 2831     |
| <i>Item 12</i>                 | 1.38  | 0.15 | 1.24 ; 1.52   | 1.15 ; 1.63   | 3083     | 2775     |
| <i>Item 15</i>                 | 1.93  | 0.19 | 1.75 ; 2.11   | 1.63 ; 2.25   | 2867     | 2987     |
| <i>Item 24</i>                 | 1.25  | 0.13 | 1.13 ; 1.37   | 1.04 ; 1.47   | 3640     | 2973     |
| <i>Item 27</i>                 | 1.46  | 0.16 | 1.30 ; 1.61   | 1.20 ; 1.74   | 3169     | 2912     |
| <i>Item 30</i>                 | 1.36  | 0.14 | 1.22 ; 1.49   | 1.14 ; 1.59   | 3061     | 3215     |
| <i>Item 33</i>                 | 1.56  | 0.16 | 1.41 ; 1.71   | 1.31 ; 1.84   | 3113     | 3147     |
| <i>Item 36</i>                 | 1.29  | 0.14 | 1.16 ; 1.42   | 1.07 ; 1.53   | 3661     | 2716     |
| <i>Item 45</i>                 | 1.63  | 0.17 | 1.47 ; 1.78   | 1.36 ; 1.91   | 3300     | 3693     |
| <i>Item 51</i>                 | 2.77  | 0.29 | 2.50 ; 3.04   | 2.33 ; 3.28   | 2256     | 2973     |
| <i>Item 54</i>                 | 1.54  | 0.18 | 1.36 ; 1.71   | 1.24 ; 1.84   | 3801     | 2680     |
| <i>Item 57</i>                 | 1.19  | 0.14 | 1.06 ; 1.33   | 0.97 ; 1.43   | 3675     | 2982     |
| <i>Item 60</i>                 | 1.25  | 0.13 | 1.12 ; 1.37   | 1.04 ; 1.47   | 3353     | 3298     |
| <i>Item 63</i>                 | 1.32  | 0.14 | 1.19 ; 1.45   | 1.10 ; 1.55   | 3477     | 3177     |
| Item threshold parameters      |       |      |               |               |          |          |
| <i>Item 3</i>                  | 0.62  | 0.09 | 0.53 ; 0.71   | 0.46 ; 0.78   | 2540     | 2532     |
| <i>Item 6</i>                  | 0.45  | 0.09 | 0.37 ; 0.53   | 0.31 ; 0.59   | 2904     | 3086     |
| <i>Item 12</i>                 | -0.50 | 0.09 | -0.58 ; -0.41 | -0.64 ; -0.36 | 2214     | 2995     |
| <i>Item 15</i>                 | 0.29  | 0.07 | 0.23 ; 0.36   | 0.18 ; 0.41   | 2638     | 3101     |
| <i>Item 24</i>                 | 0.51  | 0.09 | 0.43 ; 0.60   | 0.37 ; 0.67   | 2593     | 3170     |
| <i>Item 27</i>                 | 1.30  | 0.13 | 1.18 ; 1.42   | 1.10 ; 1.52   | 2666     | 3266     |
| <i>Item 30</i>                 | 0.15  | 0.08 | 0.08 ; 0.23   | 0.02 ; 0.29   | 2556     | 3252     |
| <i>Item 33</i>                 | -0.18 | 0.08 | -0.25 ; -0.10 | -0.31 ; -0.05 | 2638     | 2883     |
| <i>Item 36</i>                 | 0.77  | 0.10 | 0.68 ; 0.87   | 0.61 ; 0.95   | 2844     | 3342     |
| <i>Item 45</i>                 | 0.95  | 0.10 | 0.85 ; 1.04   | 0.79 ; 1.12   | 2427     | 3318     |
| <i>Item 51</i>                 | 0.47  | 0.07 | 0.41 ; 0.54   | 0.36 ; 0.59   | 2324     | 3163     |
| <i>Item 54</i>                 | 1.60  | 0.15 | 1.46 ; 1.74   | 1.36 ; 1.86   | 2711     | 2771     |
| <i>Item 57</i>                 | 1.37  | 0.15 | 1.23 ; 1.51   | 1.14 ; 1.64   | 3057     | 3339     |
| <i>Item 60</i>                 | -0.38 | 0.09 | -0.47 ; -0.30 | -0.53 ; -0.24 | 2482     | 3123     |
| <i>Item 63</i>                 | 0.04  | 0.08 | -0.03 ; 0.12  | -0.09 ; 0.17  | 2795     | 2737     |

## Beck Hopelessness Inventory

| Parameter                      | Mean  | SD   | 66% CI        | 90% CI        | ESS Bulk | ESS Tail |
|--------------------------------|-------|------|---------------|---------------|----------|----------|
| Item discrimination parameters |       |      |               |               |          |          |
| <i>Item 1</i>                  | 2.47  | 0.57 | 1.92 ; 3.00   | 1.63 ; 3.48   | 669      | 1192     |
| <i>Item 2</i>                  | 1.89  | 0.44 | 1.46 ; 2.30   | 1.23 ; 2.67   | 714      | 1363     |
| <i>Item 3</i>                  | 1.41  | 0.34 | 1.09 ; 1.73   | 0.89 ; 2.02   | 689      | 1414     |
| <i>Item 5</i>                  | 1.15  | 0.29 | 0.88 ; 1.42   | 0.72 ; 1.66   | 805      | 1496     |
| <i>Item 6</i>                  | 2.17  | 0.51 | 1.69 ; 2.64   | 1.43 ; 3.09   | 634      | 1174     |
| <i>Item 7</i>                  | 3.10  | 0.71 | 2.43 ; 3.77   | 2.04 ; 4.34   | 591      | 1519     |
| <i>Item 9</i>                  | 2.00  | 0.47 | 1.56 ; 2.43   | 1.30 ; 2.83   | 671      | 1511     |
| <i>Item 11</i>                 | 3.30  | 0.77 | 2.58 ; 4.01   | 2.16 ; 4.67   | 644      | 1437     |
| <i>Item 12</i>                 | 2.46  | 0.57 | 1.92 ; 3.00   | 1.63 ; 3.50   | 694      | 1342     |
| <i>Item 14</i>                 | 2.54  | 0.60 | 1.97 ; 3.11   | 1.68 ; 3.62   | 666      | 1354     |
| <i>Item 15</i>                 | 3.38  | 0.79 | 2.62 ; 4.12   | 2.21 ; 4.79   | 637      | 1285     |
| <i>Item 16</i>                 | 1.89  | 0.45 | 1.47 ; 2.31   | 1.25 ; 2.67   | 659      | 1358     |
| <i>Item 17</i>                 | 2.47  | 0.58 | 1.91 ; 3.01   | 1.62 ; 3.49   | 679      | 1361     |
| <i>Item 18</i>                 | 2.27  | 0.54 | 1.76 ; 2.76   | 1.50 ; 3.21   | 727      | 1289     |
| <i>Item 19</i>                 | 2.33  | 0.54 | 1.82 ; 2.84   | 1.54 ; 3.30   | 700      | 1568     |
| <i>Item 20</i>                 | 2.32  | 0.54 | 1.80 ; 2.82   | 1.52 ; 3.27   | 685      | 1528     |
| Item threshold parameters      |       |      |               |               |          |          |
| <i>Item 1</i>                  | 0.03  | 0.24 | -0.20 ; 0.26  | -0.36 ; 0.43  | 789      | 1580     |
| <i>Item 2</i>                  | 0.39  | 0.26 | 0.14 ; 0.64   | -0.03 ; 0.82  | 670      | 1642     |
| <i>Item 3</i>                  | 0.13  | 0.25 | -0.10 ; 0.38  | -0.27 ; 0.56  | 802      | 1627     |
| <i>Item 5</i>                  | -0.15 | 0.25 | -0.39 ; 0.10  | -0.56 ; 0.28  | 874      | 1671     |
| <i>Item 6</i>                  | 0.44  | 0.26 | 0.18 ; 0.70   | 0.03 ; 0.87   | 665      | 1578     |
| <i>Item 7</i>                  | 0.23  | 0.24 | 0.00 ; 0.47   | -0.16 ; 0.63  | 721      | 1556     |
| <i>Item 9</i>                  | 0.13  | 0.24 | -0.10 ; 0.36  | -0.26 ; 0.53  | 763      | 1595     |
| <i>Item 11</i>                 | 0.20  | 0.24 | -0.04 ; 0.43  | -0.20 ; 0.59  | 732      | 1613     |
| <i>Item 12</i>                 | -0.62 | 0.27 | -0.87 ; -0.36 | -1.09 ; -0.18 | 801      | 1371     |
| <i>Item 14</i>                 | -0.51 | 0.26 | -0.76 ; -0.26 | -0.95 ; -0.09 | 796      | 1246     |
| <i>Item 15</i>                 | -0.32 | 0.25 | -0.55 ; -0.08 | -0.72 ; 0.10  | 803      | 1358     |
| <i>Item 16</i>                 | 0.51  | 0.27 | 0.24 ; 0.76   | 0.08 ; 0.96   | 657      | 1697     |
| <i>Item 17</i>                 | 0.28  | 0.25 | 0.05 ; 0.53   | -0.12 ; 0.70  | 690      | 1558     |
| <i>Item 18</i>                 | -0.57 | 0.27 | -0.82 ; -0.31 | -1.02 ; -0.13 | 791      | 1314     |
| <i>Item 19</i>                 | -0.02 | 0.24 | -0.25 ; 0.21  | -0.41 ; 0.38  | 770      | 1476     |
| <i>Item 20</i>                 | 0.23  | 0.24 | 0.00 ; 0.47   | -0.17 ; 0.65  | 754      | 1465     |

As we use latent variables from IRT models rather than sum-scores in the analysis, conventional estimates of reliability (such as coefficient alpha) are not directly applicable. According to item response theory the reliability of trait estimates is not uniform across the range of the latent variable, but can be described by the test information function as long as the item response model fits the data (de Ayala, 2009). We computed and plotted the test information function for the final item sets of the CBQ and the BHS, which indicated acceptable reliability across the observed range of the latent variables.

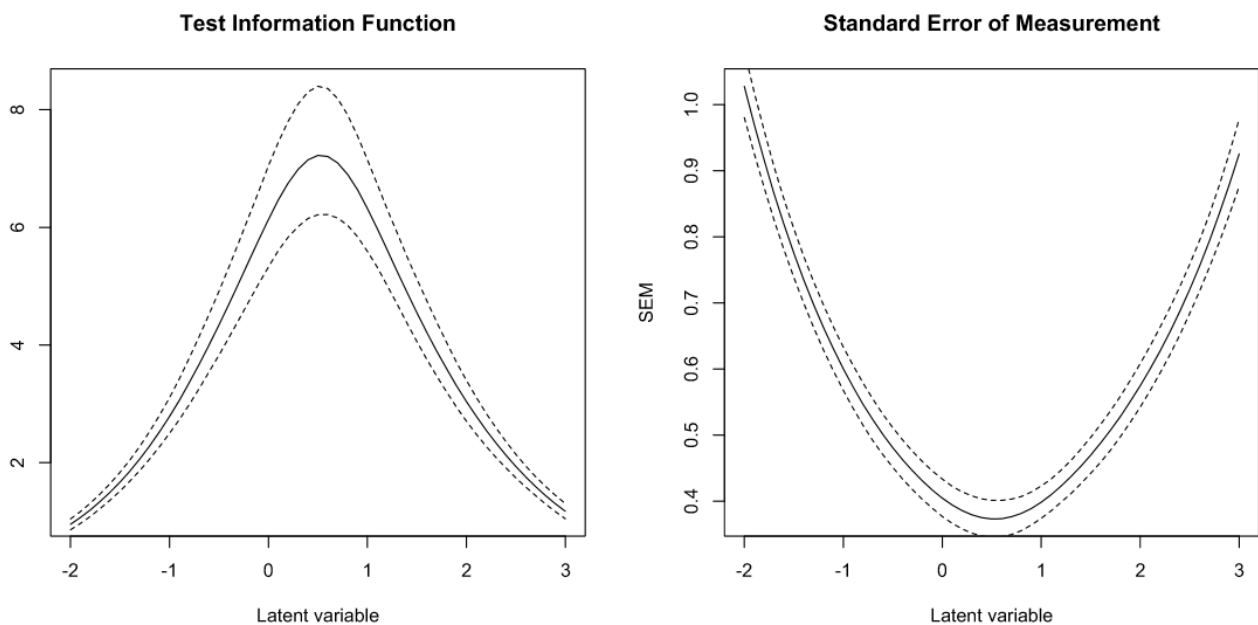

*Test information curve and plot of the standard error of measurement across the latent variable for the 15 items from the CBQ Perception of the Dyad subscale*

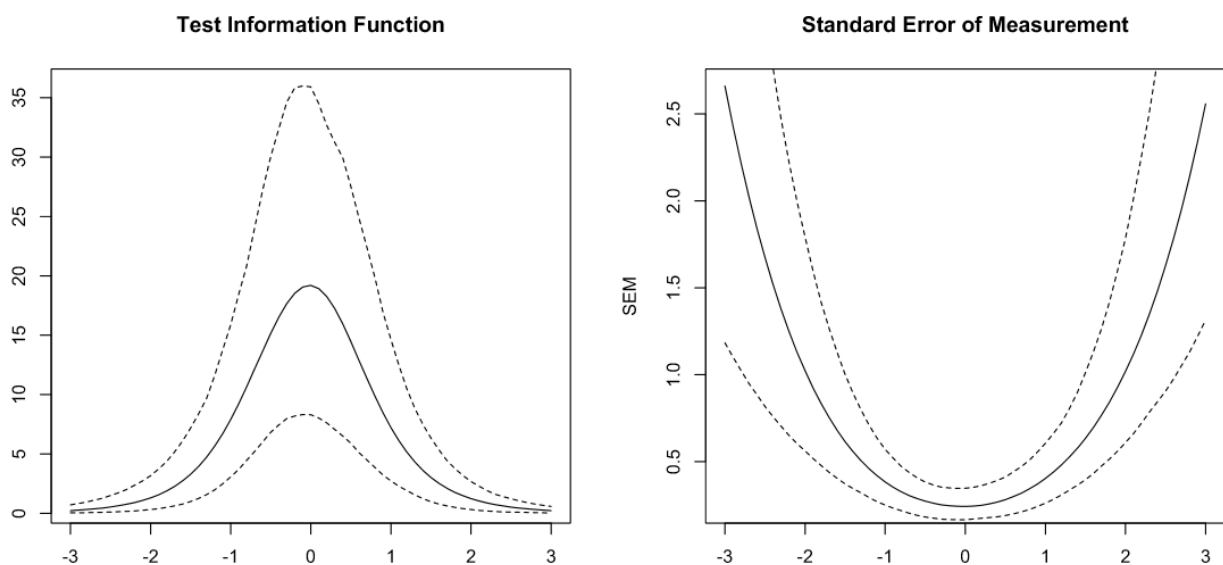

*Test information curve and plot of the standard error of measurement across the latent variable for the 16 items from the BHS*

## References

- de Ayala, R. J. (2009). *The theory and practice of item response theory*. Guilford Press.
- de Haan, A., Prinzie, P., Sentse, M., & Jongerling, J. (2018). Latent difference score modeling: A flexible approach for studying informant discrepancies. *Psychological Assessment, 30*(3), 358-369. <https://doi.org/10.1037/pas0000480>
- Gabry, J., & Mahr, T. (2021). *bayesplot: Plotting for Bayesian Models*. In (Version R package version 1.8.1) <https://mc-stan.org/bayesplot/>
- Orlando, M., & Thissen, D. (2000). Likelihood-Based Item-Fit Indices for Dichotomous Item Response Theory Models. *Applied Psychological Measurement, 24*(1), 50-64. <https://doi.org/10.1177/01466216000241003>
- Vehtari, A., Gabry, J., Yao, Y., & Gelman, A. (2019). *loo: Efficient leave-one-out cross-validation and WAIC for Bayesian models*. In (Version 2.1.0) <https://CRAN.R-project.org/package=loo>
- Verhagen, A. J., & Fox, J. P. (2013). Bayesian tests of measurement invariance. *British Journal of Mathematical and Statistical Psychology, 66*(3), 383-401. <https://doi.org/10.1111/j.2044-8317.2012.02059.x>
