# Supplementary material for: Informant Discrepancy in Report of Parent-adolescent Conflict as a Predictor of Hopelessness among Depressed Adolescents: A Replication Study
Source: Springer Nature journal article supplement (doi:10.1007/s10826-023-02610-3), 2023-06-14

# Parent report

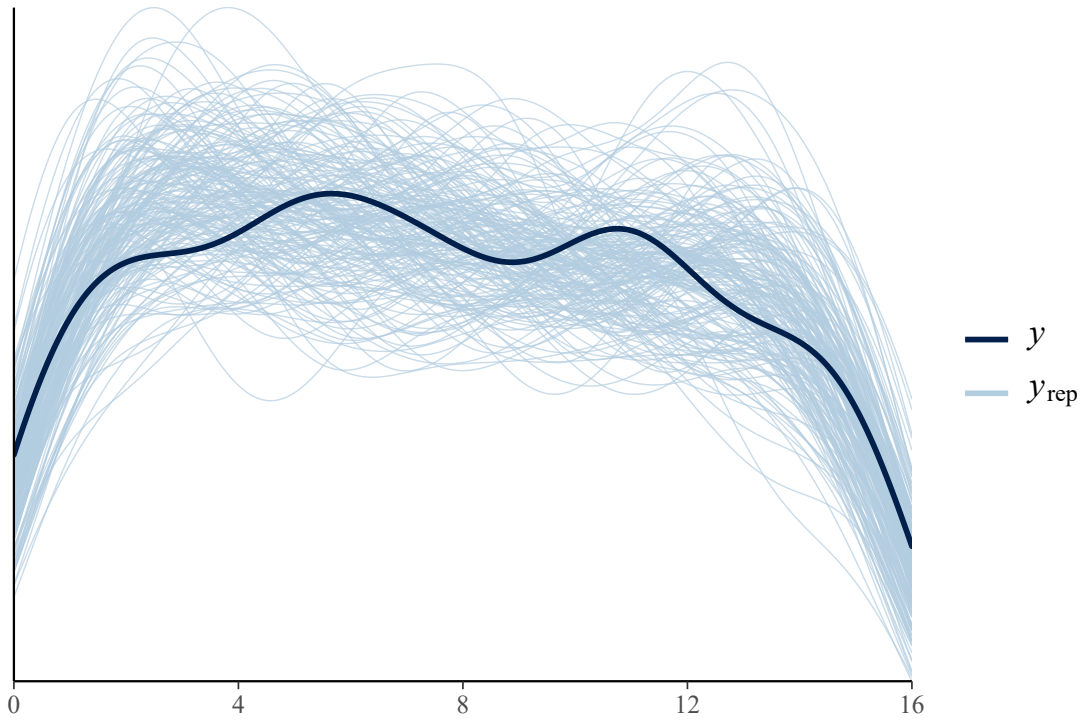

# Parent report

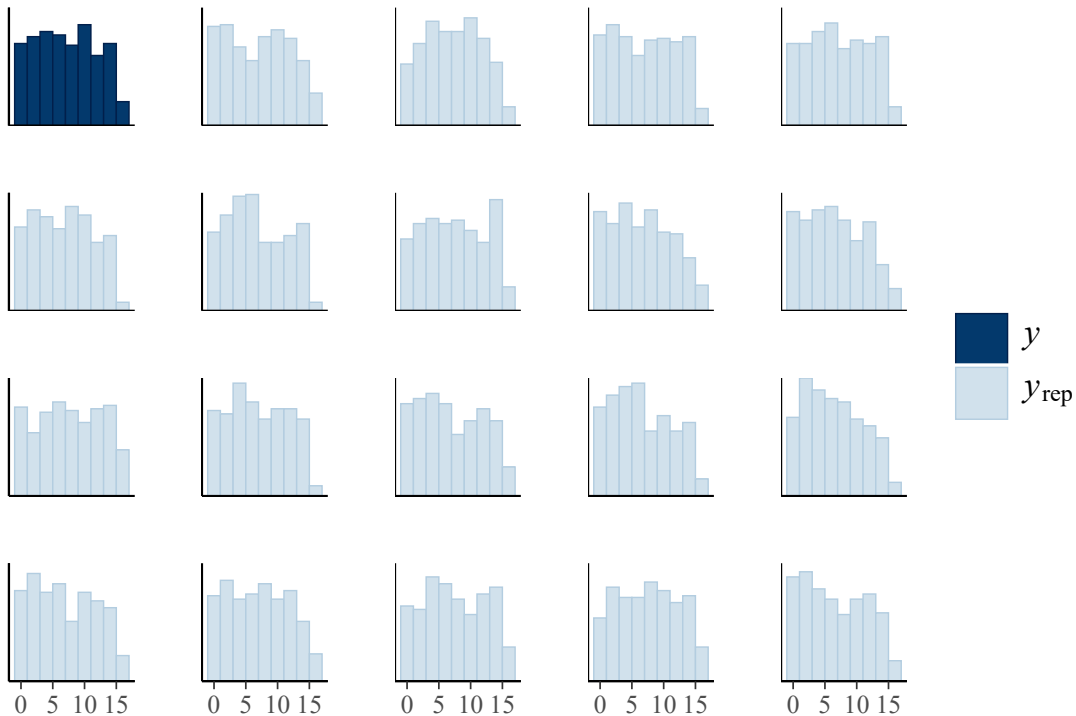

# Adolescent report

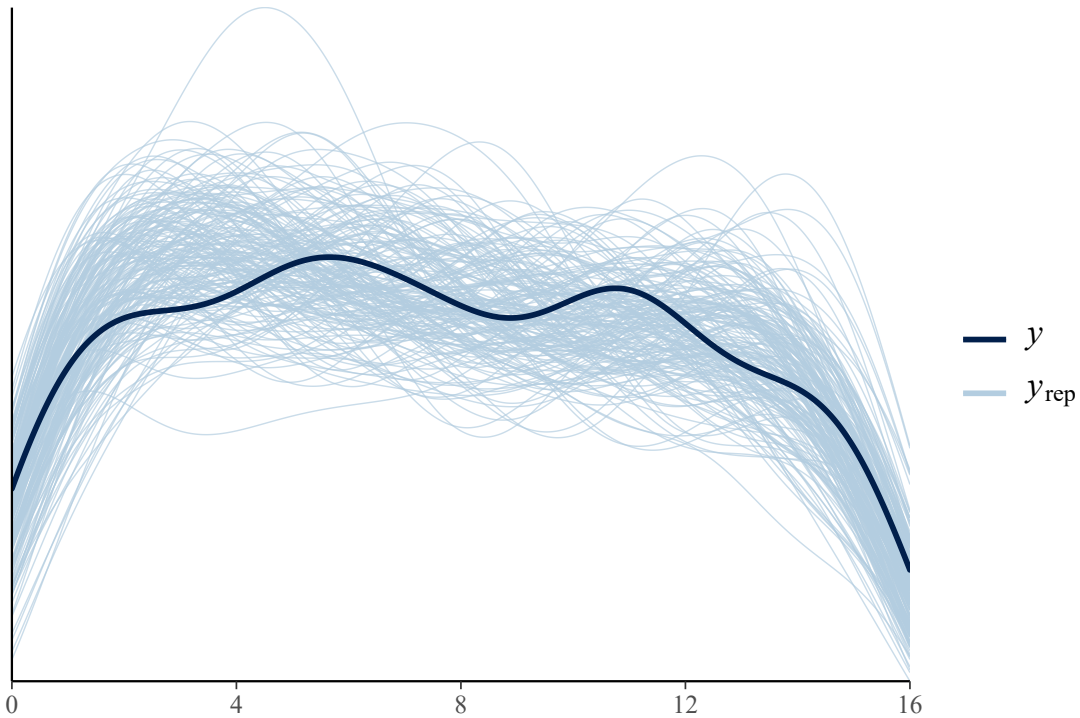



# Informant discrepancy

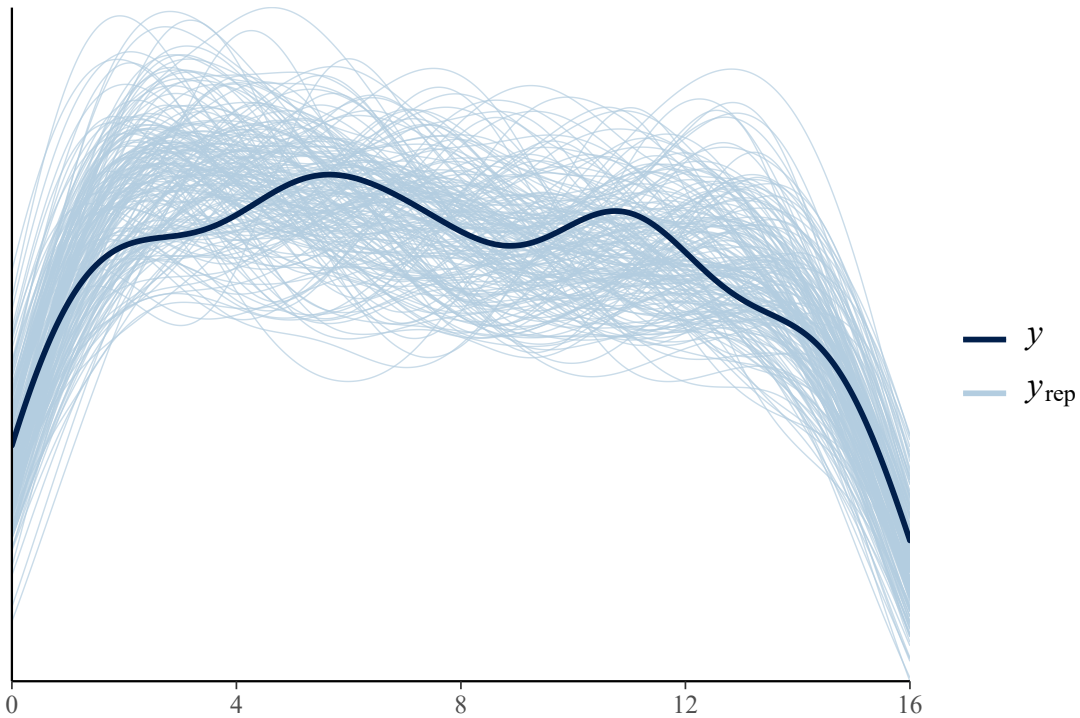

# Informant discrepancy

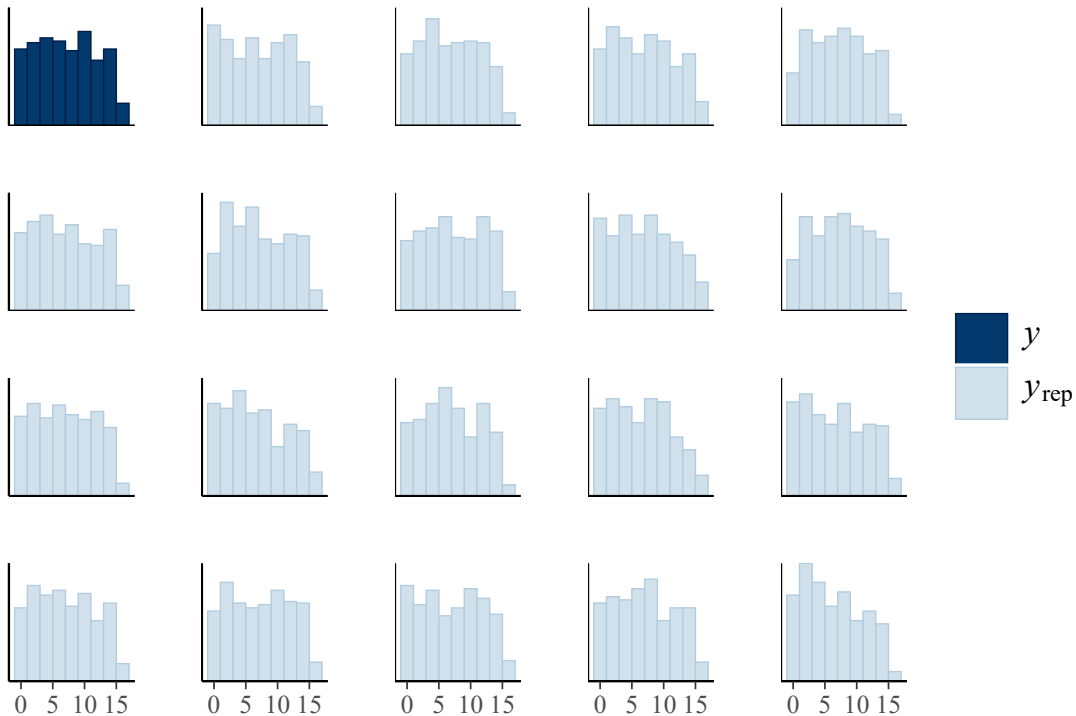

# Adjusted informant discrepancy

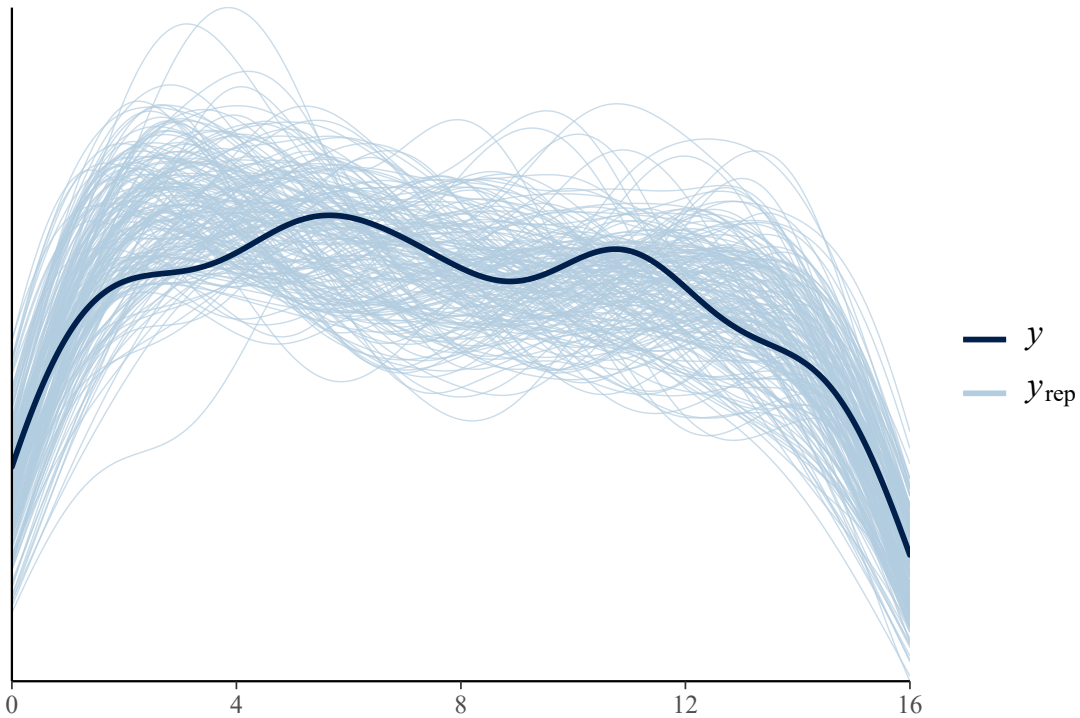

# Adjusted informant discrepancy

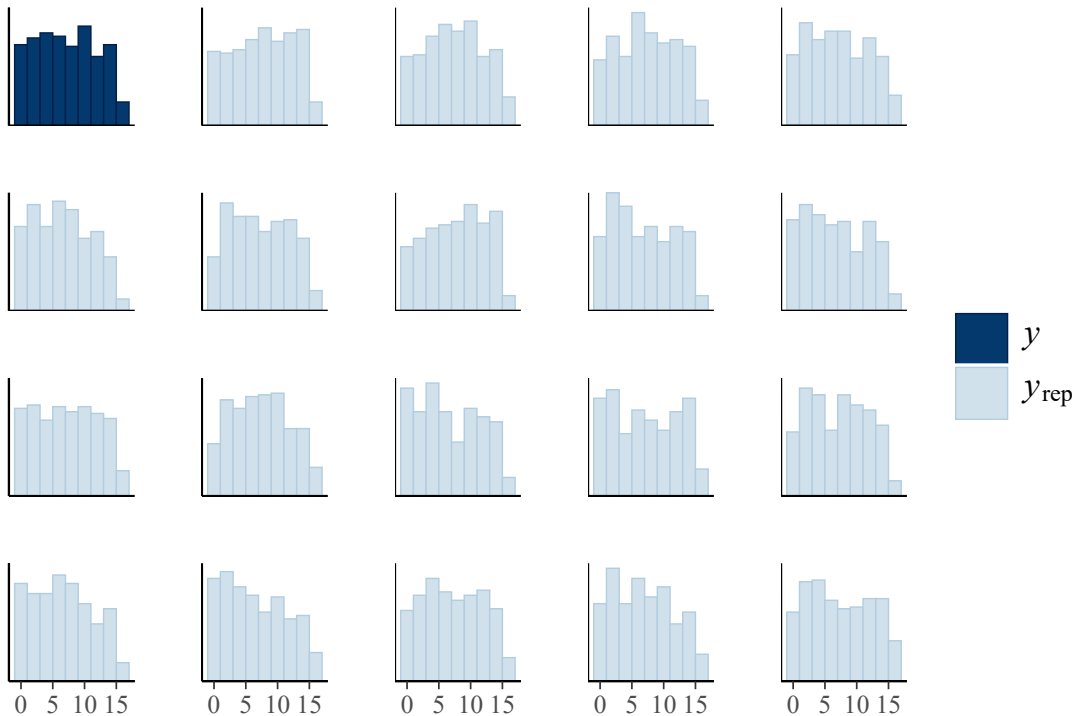

Supplement: MOESM3 [file 25488294]
